# Supplementary material for: Hydrothermally synthesized Nickel cobalt oxide for bifunctional electrochemical supercapacitor and nonenzymatic glucose biosensor
Source: Research Square preprint supplement (doi:10.21203/rs.3.rs-1098022/v1), 2021-11-23
Supplement: Supplementary file 1 [file b2af8b02652935e75e41ba07.docx]

**Table. 1** Comparison of supercapacitor performance of synthesized Nickel cobalt oxide and previously reported work. (CC: Copper cloth, NF: Nickel foam, SS: stainless steel).

| **Sr. No.** | **Electrode material** | **Current collector** | **Current density/ Scan rate** | **Specific Capacitance**  **(F g-1)** | **Electrolyte** | **Ref.** |
| --- | --- | --- | --- | --- | --- | --- |
|  | NiCo2O4 | NF | 1 A g-1 | 294 | 2M KOH | 46 |
|  | Co3O4 | SS | 1 mA cm-2 | 131 | 2M KOH | 47 |
|  | U-NiCo2O4 | NF | 1 A g-1 | 436.1 | 2M KOH | 48 |
|  | Co3O4 | NF | 1 A g-1 | 263 | 6M KOH | 49 |
|  | Co3O4 | SS | 2.75 A g-1 | 162 | 6M KOH | 50 |
|  | NiCo2O4 | NF | 1 A g-1 | 434.8 | 6M KOH | 51 |
|  | NiCo2O4 | NF | 5 mV s-1 | 332 | 2M KOH | 52 |
|  | NiCo2O4 | NF | 1 A g-1 | 372 | 2M KOH | 53 |
|  | C/NiCo2O4 | NF | 1 A g-1 | 204.3 | 3M KOH | 54 |
|  | Ni0.9Co2.1O4 | CC | 10 mV s-1 | 516.51 | 1M KOH | Present Work |

**Table. 2:** The estimated nonenzymatic glucose sensing parameters of nickel cobalt oxide samples.

| **Electrode** | **Sensitivity**  **(μA mM-1 cm-2)** | **Response time**  **(s)** | **Correlation coefficient** |
| --- | --- | --- | --- |
| Co3O4 | 370.7 | 15 | 0.9903 |
| Ni0.3Co2.7O4 | 759.5 | 10 | 0.9926 |
| Ni0.6Co2.4O4 | 747.4 | 18 | 0.9826 |
| Ni0.9Co2.1O4 | 557.7 | 16 | 0.9585 |
| Ni1.2Co1.8O4 | 688.1 | 11 | 0.9885 |

**Table. 3** Comparison of glucose sensing performance of synthesized nickel cobalt oxide with previously reported work.(GCE: Glassy carbon electrode, NPs: Nanoparticles)

| **Sr. No.** | **Glucose sensor** | **Working potential**  **(V)** | **Sensitivity**  **(μA mM-1 cm-2)** | **Ref.** |
| --- | --- | --- | --- | --- |
|  | Co3O4 nanofibers-Nafion/GCE | + 0.59 | 36.25 | 55 |
|  | NiCo2O4 | + 0.5 | 662.31 | 56 |
|  | NiCo2O4 /rGO | + 0.42 | 548.9 | 57 |
|  | NiCo2O4 | + 0.5 | 142.14 | 58 |
|  | NiCo2O4 | + 0.4 | 27.5 | 59 |
|  | Ni0.3Co2.7O4 | + 0.45 | 759.5 | Present work |
